# Supplementary material for: Theoretical studies on the isomerization mechanism of the ortho-green fluorescent protein chromophore
Source: Royal Society of Chemistry journal article supplement (doi:10.1039/c2cp41959a), 2012-01-01
Supplement: c2cp41959a.pdf [file c2cp41959a.pdf]

# Supporting Information for “Theoretical studies on isomerization mechanism of the *ortho*-Green Fluorescent Protein chromophore”

Yue-jie Ai, Rong-zhen liao, Wei-hai Fang, and Yi Luo

**SI-1:** Geometrical structures of (1-5) and (1-7) tautomer, and corresponding transition states of structure D. The geometrical parameters are given in Å.

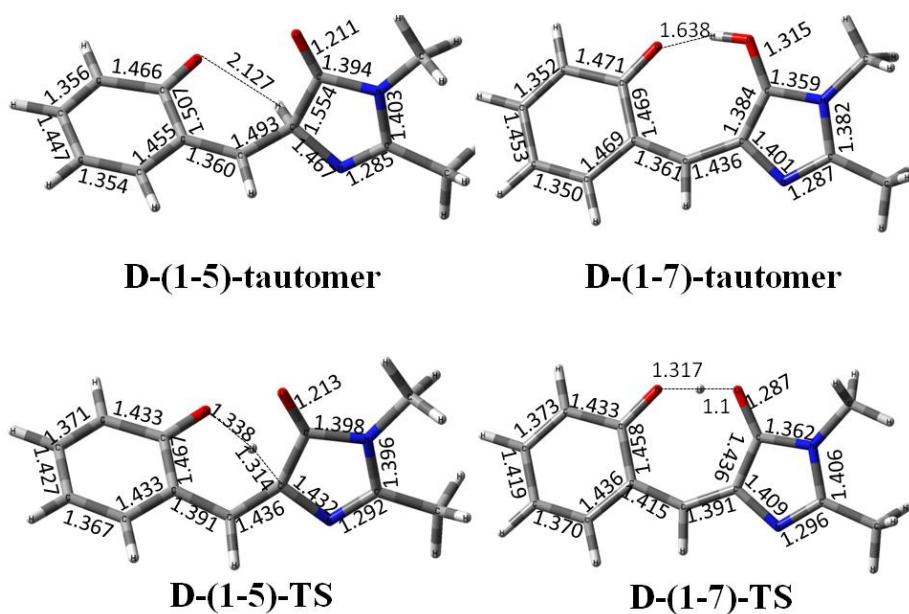

*Figure S1*

**SI-2:** Energy profile for the ground-state hydrogen transfer from A to E along the O-H bond coordinate.

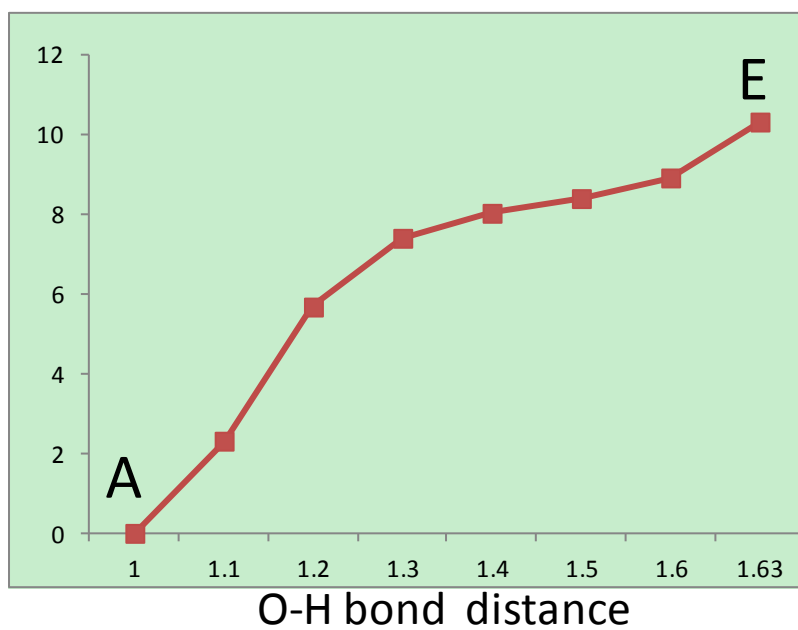

Figure S2

SI-3: Transition orbitals for first singlet excited-state of *o*-HBDI and its ESIPT tautomer.

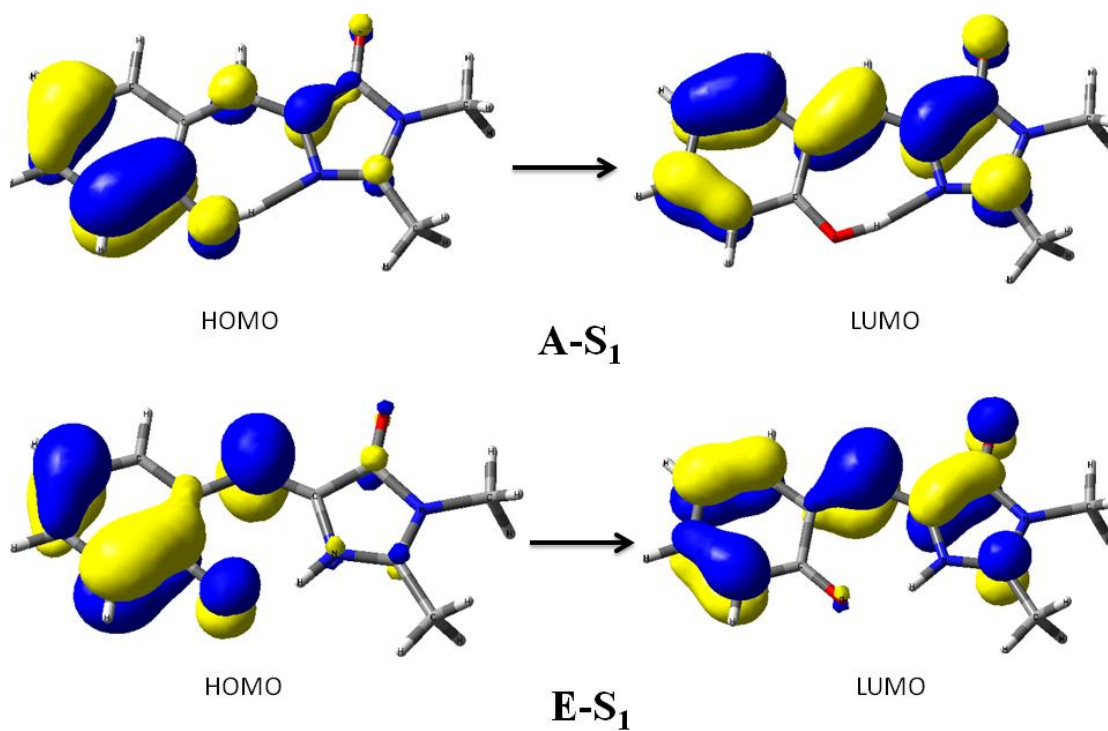

**Figure S3**

**SI-4: Table S1. Calculated vertical excitation energies and oscillator strengths for all the isomers and their anion form at PCM//TDDFT/B3LYP/6-31G(d) level.**

| absorption         | PCM//TDDFT/B3LYP/6-31G(d) (eV) | f        |
|--------------------|--------------------------------|----------|
| <i>o</i> -HBDI (A) | 3.3919eV 365.53 nm             | f=0.3851 |
| B                  | 3.3084 eV 374.76 nm            | f=0.5949 |
| C                  | 3.2501 eV 381.48 nm            | f=0.5020 |
| D                  | 3.2335 eV 383.44 nm            | f=0.3130 |
| E                  | 2.8742eV 431.42nm              | f=0.4843 |
| F                  | 2.6359 eV 470.36 nm            | f=0.5763 |
| G                  | 2.6741 eV 463.64 nm            | f=0.5411 |
| H                  | 2.5608 eV 484.15 nm            | f=0.2540 |
| D-(1-5)            | 2.7621 eV 448.87 nm            | f=0.0234 |
| D-(1-7)            | 2.0144 eV 615.48 nm            | f=0.1205 |
| A-anion            | 2.6314 eV 471.23 nm            | f=0.2607 |
| B-anion            | 2.8226 eV 439.26 nm            | f=0.5742 |
| C-anion            | 2.7217 eV 455.54 nm            | f=0.5380 |
| D-anion            | 2.7003 eV 459.15 nm            | f=0.3305 |
| E-anion            | 2.9939 eV 414.12 nm            | f=0.6024 |
| F-anion            | 2.7264 eV 454.75 nm            | f=0.5790 |
| G-anion            | 2.8613 eV 433.31 nm            | f=0.5862 |
| H-anion            | 2.8127 eV 440.81 nm            | f=0.3521 |

**SI-5: Cartesian coordinates ( $\text{\AA}$ ) of geometry of  $A-S_1$  calculated at CAS(12,11)/6-31G(d) level.**

|   |           |           |           |
|---|-----------|-----------|-----------|
| C | -1.419327 | -0.500399 | 0.00384   |
| H | -1.761042 | -1.042339 | -0.872851 |
| H | -1.761051 | -1.042173 | 0.880616  |
| H | -0.338264 | -0.487921 | 0.003822  |
| C | -1.926483 | 0.902718  | 0.003653  |
| N | -1.181299 | 1.964308  | 0.003352  |
| C | -2.013063 | 3.069058  | 0.003109  |
| C | -1.652685 | 4.416822  | 0.001398  |
| H | -2.502999 | 5.074427  | 0.001032  |
| C | -0.415061 | 5.064424  | -0.000999 |
| C | -0.404202 | 6.4898    | -0.004374 |
| H | -1.352194 | 6.993301  | -0.004271 |
| C | 0.913688  | 4.487459  | -0.000866 |

|   |           |           |           |
|---|-----------|-----------|-----------|
| C | 0.787834  | 7.300559  | -0.008616 |
| H | 0.673831  | 8.3684    | -0.011762 |
| C | 2.094645  | 5.300189  | -0.004563 |
| H | 3.026507  | 4.769038  | -0.004208 |
| C | 2.045002  | 6.714199  | -0.008812 |
| C | -3.393014 | 2.601319  | 0.003387  |
| O | -4.43982  | 3.209389  | 0.003141  |
| N | -3.267278 | 1.213397  | 0.003795  |
| C | -4.383306 | 0.299918  | 0.003011  |
| H | -5.285319 | 0.892134  | 0.003937  |
| H | -4.378455 | -0.33147  | 0.884556  |
| H | -4.378959 | -0.329459 | -0.88     |
| H | 2.945295  | 7.296405  | -0.012077 |
| O | 1.161813  | 3.204024  | 0.002584  |
| H | 0.372636  | 2.629988  | 0.003375  |

***SI-6: Cartesian coordinates ( $\text{\AA}$ ) of geometry of  $E\text{-}S_1$  calculated at CAS(12,11)/6-31G(d) level.***

|   |           |           |           |
|---|-----------|-----------|-----------|
| C | -1.403145 | -0.489848 | 0.005202  |
| H | -1.73485  | -1.03545  | -0.871603 |
| H | -1.734279 | -1.032777 | 0.883884  |
| H | -0.322635 | -0.453188 | 0.004797  |
| C | -1.960243 | 0.891736  | 0.00329   |
| N | -1.25169  | 1.981446  | 0.001337  |
| C | -2.058466 | 3.119907  | 0.000069  |
| C | -1.673297 | 4.453288  | -0.001784 |
| H | -2.516041 | 5.119082  | -0.002127 |
| C | -0.367242 | 5.125017  | -0.003216 |
| C | -0.387768 | 6.498832  | -0.003888 |
| H | -1.338988 | 7.00115   | -0.003314 |
| C | 0.94602   | 4.464848  | -0.004078 |
| C | 0.809577  | 7.326722  | -0.005316 |
| H | 0.705438  | 8.395618  | -0.005705 |
| C | 2.10103   | 5.292341  | -0.00546  |
| H | 3.050643  | 4.790946  | -0.006096 |
| C | 2.031724  | 6.718764  | -0.00609  |
| C | -3.406082 | 2.626711  | 0.00117   |
| O | -4.48815  | 3.170946  | 0.000558  |
| N | -3.253742 | 1.20327   | 0.003203  |
| C | -4.374808 | 0.286305  | 0.004834  |
| H | -5.270006 | 0.886795  | 0.004173  |
| H | -4.365245 | -0.337806 | 0.88985   |

|   |           |           |           |
|---|-----------|-----------|-----------|
| H | -4.365691 | -0.340413 | -0.878342 |
| H | 2.939813  | 7.293949  | -0.007157 |
| O | 1.063827  | 3.213505  | -0.003273 |
| H | -0.246321 | 2.080235  | 0.00062   |

**SI-7: Cartesian coordinates (Å) of geometry of conical intersection (CI) calculated at CAS(8,7)/6-31G(d) level.**

|   |           |           |           |
|---|-----------|-----------|-----------|
| C | 2.509696  | 2.423854  | -0.528336 |
| H | 1.822595  | 3.033523  | -1.102004 |
| H | 3.499571  | 2.543236  | -0.950547 |
| H | 2.527857  | 2.800972  | 0.494787  |
| C | 2.0686    | 1.00203   | -0.568091 |
| N | 0.755846  | 0.647274  | -0.424683 |
| C | 0.688182  | -0.662132 | 0.067384  |
| C | -0.4214   | -1.297241 | 0.393733  |
| H | -0.33989  | -2.234507 | 0.913271  |
| C | -1.762103 | -0.702913 | 0.114258  |
| C | -2.625428 | -1.253141 | -0.810136 |
| H | -2.345484 | -2.149248 | -1.335207 |
| C | -2.109716 | 0.533526  | 0.774171  |
| C | -3.891989 | -0.678303 | -1.044977 |
| H | -4.570703 | -1.147157 | -1.733179 |
| C | -3.403128 | 1.078367  | 0.520559  |
| H | -3.679213 | 1.971346  | 1.050668  |
| C | -4.265645 | 0.470346  | -0.359814 |
| C | 2.089523  | -1.134034 | 0.237713  |
| O | 2.477922  | -2.205121 | 0.594504  |
| N | 2.859974  | -0.061861 | -0.127116 |
| C | 4.299808  | -0.128252 | -0.242158 |
| H | 4.609184  | -1.104628 | 0.095169  |
| H | 4.770522  | 0.625968  | 0.376439  |
| H | 4.610993  | 0.00955   | -1.271498 |
| H | -5.239472 | 0.895498  | -0.528517 |
| O | -1.246183 | 1.135595  | 1.471695  |
| H | 0.110989  | 1.301126  | -0.002214 |

**SI-8: Cartesian coordinates (Å) of geometry of A-E-S<sub>I</sub>-TS calculated at CAS(12,11)/6-31G(d) level.**

|   |          |          |          |
|---|----------|----------|----------|
| C | -1.29962 | -0.38923 | -0.00028 |
| H | -1.61051 | -0.95019 | -0.87628 |
| H | -1.6067  | -0.94994 | 0.87723  |

|   |          |          |          |
|---|----------|----------|----------|
| H | -0.22049 | -0.31614 | -0.00277 |
| C | -1.89125 | 0.979626 | 0.000576 |
| N | -1.22226 | 2.090646 | -0.00161 |
| C | -2.1131  | 3.157864 | -0.00096 |
| C | -1.76734 | 4.501    | -0.00235 |
| H | -2.59552 | 5.18341  | -0.0026  |
| C | -0.45925 | 5.110538 | -0.00332 |
| C | -0.37801 | 6.491588 | -0.00721 |
| H | -1.29706 | 7.047941 | -0.00995 |
| C | 0.826149 | 4.422814 | -0.00013 |
| C | 0.864279 | 7.255926 | -0.00768 |
| H | 0.805374 | 8.327755 | -0.01089 |
| C | 2.045219 | 5.180366 | -0.00012 |
| H | 2.950234 | 4.604401 | 0.003157 |
| C | 2.068419 | 6.599785 | -0.0039  |
| C | -3.44478 | 2.616857 | 0.001738 |
| O | -4.535   | 3.142722 | 0.003509 |
| N | -3.23542 | 1.231199 | 0.002182 |
| C | -4.30806 | 0.266147 | 0.008331 |
| H | -5.23193 | 0.822762 | -0.00637 |
| H | -4.28061 | -0.35013 | 0.900191 |
| H | -4.26708 | -0.3753  | -0.86491 |
| H | 3.003722 | 7.125554 | -0.00384 |
| O | 0.955236 | 3.161117 | 0.002921 |
| H | 0.012767 | 2.540423 | 0.000542 |

***SI-9: Cartesian coordinates (Å) of geometry of A-S0 calculated at B3LYP/6-31G(d) level.***

|   |          |          |          |
|---|----------|----------|----------|
| C | -1.42736 | -0.50942 | 0.004899 |
| H | -1.78566 | -1.05321 | -0.87785 |
| H | -1.78467 | -1.0506  | 0.889656 |
| H | -0.336   | -0.51515 | 0.004304 |
| C | -1.91194 | 0.900484 | 0.003107 |
| N | -1.13916 | 1.95103  | 0.00134  |
| C | -1.97209 | 3.077692 | 0.000169 |
| C | -1.61563 | 4.390887 | -0.00172 |
| H | -2.47907 | 5.054844 | -0.00221 |
| C | -0.34086 | 5.074623 | -0.00309 |
| C | -0.4067  | 6.494027 | -0.00452 |
| H | -1.39299 | 6.951785 | -0.00448 |
| C | 0.959504 | 4.475746 | -0.00317 |
| C | 0.717543 | 7.297363 | -0.00591 |

|   |          |          |          |
|---|----------|----------|----------|
| H | 0.621668 | 8.378665 | -0.00697 |
| C | 2.09531  | 5.308573 | -0.00457 |
| H | 3.065028 | 4.821085 | -0.00457 |
| C | 1.982354 | 6.688957 | -0.00592 |
| C | -3.38205 | 2.627132 | 0.00137  |
| O | -4.43637 | 3.242466 | 0.000989 |
| N | -3.25772 | 1.219551 | 0.00324  |
| C | -4.39583 | 0.321188 | 0.004869 |
| H | -5.28834 | 0.950826 | 0.005546 |
| H | -4.40272 | -0.31311 | 0.897767 |
| H | -4.40473 | -0.31392 | -0.88745 |
| H | 2.881524 | 7.299731 | -0.007   |
| O | 1.214628 | 3.162732 | -0.00205 |
| H | 0.389761 | 2.593536 | -0.00059 |

### PCM

|   |           |           |           |
|---|-----------|-----------|-----------|
| C | -3.149519 | 2.257782  | 0.000129  |
| H | -3.795042 | 2.32467   | 0.883644  |
| H | -3.795328 | 2.324835  | -0.883165 |
| H | -2.458313 | 3.102071  | 0.00009   |
| C | -2.378248 | 0.984619  | -0.000123 |
| N | -1.074703 | 0.898394  | -0.000324 |
| C | -0.750963 | -0.463949 | -0.000251 |
| C | 0.482355  | -1.036294 | -0.000125 |
| H | 0.44367   | -2.124421 | -0.000124 |
| C | 1.825858  | -0.492584 | -0.000032 |
| C | 2.874284  | -1.451281 | 0.000075  |
| H | 2.596393  | -2.502275 | 0.000072  |
| C | 2.197837  | 0.889337  | -0.000025 |
| C | 4.212635  | -1.100585 | 0.000199  |
| H | 4.981782  | -1.866409 | 0.000287  |
| C | 3.563746  | 1.230254  | 0.000095  |
| H | 3.814171  | 2.286728  | 0.000092  |
| C | 4.55498   | 0.260009  | 0.000207  |
| C | -2.008527 | -1.246702 | -0.000494 |
| O | -2.208777 | -2.456381 | -0.000066 |
| N | -2.997956 | -0.252858 | 0.000009  |
| C | -4.425816 | -0.529041 | 0.000532  |
| H | -4.53862  | -1.61433  | -0.000222 |
| H | -4.904995 | -0.115968 | -0.891609 |
| H | -4.904149 | -0.117305 | 0.893753  |
| H | 5.59904   | 0.56132   | 0.000299  |
| O | 1.346377  | 1.92669   | -0.000148 |

H 0.377474 1.65047 -0.000338

**SI-10: Cartesian coordinates (Å) of geometry of B-S0 calculated at B3LYP/6-31G(d) level.**

|   |          |          |          |
|---|----------|----------|----------|
| C | -4.53308 | 4.792044 | -3.82118 |
| H | -5.53694 | 5.150496 | -3.56131 |
| H | -4.65049 | 4.032654 | -4.60443 |
| H | -3.9501  | 5.624414 | -4.21846 |
| C | -3.82991 | 4.236598 | -2.62866 |
| N | -2.70048 | 4.691724 | -2.16589 |
| C | -2.39344 | 3.899933 | -1.05227 |
| C | -1.32255 | 3.965094 | -0.21844 |
| H | -1.3826  | 3.212024 | 0.56771  |
| C | -0.19279 | 4.870909 | -0.21156 |
| C | -0.11379 | 5.986056 | -1.08109 |
| H | -0.91871 | 6.129653 | -1.79248 |
| C | 0.873812 | 4.676192 | 0.707637 |
| C | 0.949769 | 6.873065 | -1.02559 |
| H | 0.98235  | 7.723353 | -1.70039 |
| C | 1.939832 | 5.579795 | 0.765103 |
| H | 2.730323 | 5.394723 | 1.485286 |
| C | 1.976619 | 6.671483 | -0.09307 |
| C | -3.46302 | 2.881454 | -0.85979 |
| O | -3.59789 | 1.998216 | -0.02673 |
| N | -4.34922 | 3.162906 | -1.91196 |
| C | -5.57214 | 2.422446 | -2.14967 |
| H | -5.62888 | 1.653613 | -1.3757  |
| H | -5.56302 | 1.940683 | -3.13347 |
| H | -6.45263 | 3.070154 | -2.07648 |
| H | 2.812255 | 7.364405 | -0.04118 |
| O | 0.941487 | 3.629991 | 1.580145 |
| H | 0.254554 | 2.977572 | 1.378949 |

**PCM**

|   |           |           |           |
|---|-----------|-----------|-----------|
| C | 3.39635   | 2.268031  | 0.188688  |
| H | 4.042961  | 2.360887  | -0.692032 |
| H | 4.049487  | 2.21102   | 1.067652  |
| H | 2.770602  | 3.158414  | 0.266792  |
| C | 2.526427  | 1.062739  | 0.089631  |
| N | 1.221114  | 1.087039  | 0.097379  |
| C | 0.810988  | -0.247988 | -0.012188 |
| C | -0.446539 | -0.762587 | -0.047045 |
| H | -0.442849 | -1.847791 | -0.139825 |



|   |           |           |           |
|---|-----------|-----------|-----------|
| C | -1.73195  | -0.091868 | -0.01656  |
| C | -1.853187 | 1.314991  | -0.128701 |
| H | -0.941257 | 1.896472  | -0.196205 |
| C | -2.932108 | -0.847086 | 0.0872    |
| C | -3.091516 | 1.938844  | -0.162204 |
| H | -3.153102 | 3.018887  | -0.256032 |
| C | -4.1793   | -0.213551 | 0.044048  |
| H | -5.071356 | -0.827068 | 0.122763  |
| C | -4.260104 | 1.168333  | -0.082704 |
| C | 2.014176  | -1.124134 | -0.090134 |
| O | 2.116625  | -2.342268 | -0.192286 |
| N | 3.068948  | -0.213644 | -0.018713 |
| C | 4.47339   | -0.585743 | -0.056406 |
| H | 4.513739  | -1.67332  | -0.137204 |
| H | 4.986833  | -0.273594 | 0.857641  |
| H | 4.974215  | -0.142175 | -0.92203  |
| H | -5.234954 | 1.647038  | -0.111662 |
| O | -2.966412 | -2.203852 | 0.226523  |
| H | -2.086222 | -2.553468 | 0.433833  |

***SI-11: Cartesian coordinates (Å) of geometry of C-S0 calculated at B3LYP/6-31G(d) level.***

|   |          |          |          |
|---|----------|----------|----------|
| C | -4.35718 | 4.891074 | -3.83878 |
| H | -5.3022  | 5.399897 | -3.61077 |
| H | -4.5548  | 4.186868 | -4.65672 |
| H | -3.62905 | 5.630424 | -4.1765  |
| C | -3.81169 | 4.191991 | -2.63896 |
| N | -2.65713 | 4.438535 | -2.10188 |
| C | -2.53134 | 3.568851 | -0.99954 |
| C | -1.41425 | 3.641672 | -0.22003 |
| H | -0.73573 | 4.398518 | -0.61489 |
| C | -0.9449  | 2.926429 | 0.949375 |
| C | -1.51234 | 1.716982 | 1.418164 |
| H | -2.39785 | 1.339537 | 0.921747 |
| C | 0.195184 | 3.426344 | 1.64182  |
| C | -0.95779 | 1.023427 | 2.483645 |
| H | -1.41103 | 0.093967 | 2.815194 |
| C | 0.75466  | 2.717227 | 2.707412 |
| H | 1.625837 | 3.135828 | 3.200932 |
| C | 0.184971 | 1.519643 | 3.123096 |
| C | -3.76017 | 2.724437 | -0.91548 |
| O | -4.1085  | 1.828982 | -0.1548  |
| N | -4.52951 | 3.18976  | -1.98753 |
| C | -5.83603 | 2.656649 | -2.3187  |

|   |          |          |          |
|---|----------|----------|----------|
| H | -6.06012 | 1.887209 | -1.57689 |
| H | -5.84153 | 2.20535  | -3.317   |
| H | -6.60593 | 3.434573 | -2.27382 |
| H | 0.624877 | 0.978679 | 3.956786 |
| O | 0.814873 | 4.602109 | 1.326582 |
| H | 0.246651 | 5.133611 | 0.749744 |

PCM

|   |           |           |           |
|---|-----------|-----------|-----------|
| C | -4.376296 | 1.423596  | -0.226425 |
| H | -4.937788 | 1.285793  | 0.705365  |
| H | -4.964629 | 0.968345  | -1.032081 |
| H | -4.270918 | 2.491738  | -0.423272 |
| C | -3.023113 | 0.805811  | -0.135011 |
| N | -1.899658 | 1.446437  | -0.267293 |
| C | -0.872639 | 0.492548  | -0.113873 |
| C | 0.429873  | 0.894128  | -0.153077 |
| H | 0.497522  | 1.970436  | -0.311269 |
| C | 1.701078  | 0.197058  | -0.072147 |
| C | 1.853711  | -1.194198 | -0.281828 |
| H | 0.961986  | -1.790987 | -0.42504  |
| C | 2.884508  | 0.957973  | 0.14622   |
| C | 3.105771  | -1.792736 | -0.309122 |
| H | 3.190203  | -2.861398 | -0.482392 |
| C | 4.143762  | 0.351751  | 0.10928   |
| H | 5.019089  | 0.970838  | 0.278989  |
| C | 4.25576   | -1.014943 | -0.121821 |
| C | -1.500147 | -0.842667 | 0.125724  |
| O | -1.024226 | -1.961292 | 0.309599  |
| N | -2.862202 | -0.556915 | 0.10667   |
| C | -3.902468 | -1.553416 | 0.30041   |
| H | -3.404613 | -2.512627 | 0.450328  |
| H | -4.551274 | -1.617197 | -0.578045 |
| H | -4.508271 | -1.320166 | 1.181125  |
| H | 5.239315  | -1.475926 | -0.143377 |
| O | 2.88224   | 2.300965  | 0.394129  |
| H | 1.999491  | 2.597687  | 0.664235  |

**SI-12: Cartesian coordinates (Å) of geometry of D-S0 calculated at B3LYP/6-31G(d) level.**

|   |          |          |          |
|---|----------|----------|----------|
| C | -4.40077 | -1.32027 | 0.219748 |
| H | -4.96037 | -1.19543 | -0.71584 |
| H | -4.96099 | -0.80204 | 1.008184 |
| H | -4.35149 | -2.38297 | 0.462724 |

|   |          |          |          |
|---|----------|----------|----------|
| C | -3.01046 | -0.79348 | 0.099949 |
| N | -1.93213 | -1.49106 | 0.262615 |
| C | -0.84728 | -0.60868 | 0.066344 |
| C | 0.427907 | -1.10124 | 0.08859  |
| H | 0.412599 | -2.18444 | 0.204201 |
| C | 1.773482 | -0.57616 | -0.02568 |
| C | 2.760855 | -1.54512 | -0.35859 |
| H | 2.425694 | -2.5607  | -0.55466 |
| C | 2.228535 | 0.749667 | 0.255824 |
| C | 4.106671 | -1.24597 | -0.44625 |
| H | 4.823527 | -2.0156  | -0.71556 |
| C | 3.606348 | 1.031199 | 0.187971 |
| H | 3.911975 | 2.045953 | 0.421671 |
| C | 4.531059 | 0.060718 | -0.16039 |
| C | -1.38708 | 0.727845 | -0.25023 |
| O | -0.83284 | 1.800106 | -0.53828 |
| N | -2.75833 | 0.549697 | -0.21279 |
| C | -3.71559 | 1.60677  | -0.48076 |
| H | -3.14363 | 2.517203 | -0.66952 |
| H | -4.37526 | 1.766503 | 0.378422 |
| H | -4.32349 | 1.375802 | -1.36194 |
| H | 5.586721 | 0.315199 | -0.20765 |
| O | 1.448923 | 1.754031 | 0.678849 |
| H | 0.563734 | 1.774464 | 0.213498 |

#### PCM

|   |           |           |           |
|---|-----------|-----------|-----------|
| C | -4.393608 | -1.365489 | 0.255968  |
| H | -4.939479 | -1.246294 | -0.687554 |
| H | -4.957634 | -0.832461 | 1.030552  |
| H | -4.35606  | -2.425594 | 0.511905  |
| C | -3.002832 | -0.842763 | 0.144325  |
| N | -1.921768 | -1.53793  | 0.324125  |
| C | -0.838298 | -0.654454 | 0.125741  |
| C | 0.44034   | -1.134102 | 0.148363  |
| H | 0.44805   | -2.217019 | 0.266325  |
| C | 1.777888  | -0.582553 | 0.021484  |
| C | 2.776287  | -1.520063 | -0.360295 |
| H | 2.460725  | -2.537173 | -0.57786  |
| C | 2.210822  | 0.741401  | 0.333543  |
| C | 4.1145    | -1.185457 | -0.468781 |
| H | 4.841757  | -1.930479 | -0.77599  |
| C | 3.577033  | 1.060617  | 0.242768  |
| H | 3.870124  | 2.074039  | 0.498973  |

|   |           |          |           |
|---|-----------|----------|-----------|
| C | 4.517276  | 0.121077 | -0.155638 |
| C | -1.385769 | 0.677784 | -0.205288 |
| O | -0.82052  | 1.748908 | -0.493735 |
| N | -2.749342 | 0.49646  | -0.18034  |
| C | -3.72105  | 1.542433 | -0.463175 |
| H | -3.164996 | 2.462834 | -0.645329 |
| H | -4.390449 | 1.687482 | 0.389056  |
| H | -4.310325 | 1.295632 | -1.350821 |
| H | 5.565148  | 0.40123  | -0.219188 |
| O | 1.403624  | 1.71049  | 0.809011  |
| H | 0.53055   | 1.732325 | 0.317132  |

**SI-13: Cartesian coordinates (Å) of geometry of E-S0 calculated at B3LYP/6-31G(d) level.**

|   |          |          |          |
|---|----------|----------|----------|
| C | -1.36868 | -0.48409 | 0.004359 |
| H | -1.69895 | -1.04322 | -0.8794  |
| H | -1.69809 | -1.04111 | 0.889772 |
| H | -0.27694 | -0.44715 | 0.00378  |
| C | -1.92472 | 0.895871 | 0.002992 |
| N | -1.21096 | 2.005654 | 0.00123  |
| C | -2.03499 | 3.136096 | 0.000316 |
| C | -1.64419 | 4.464056 | -0.00152 |
| H | -2.50819 | 5.128321 | -0.00182 |
| C | -0.38789 | 5.104549 | -0.00298 |
| C | -0.40769 | 6.539678 | -0.00466 |
| H | -1.37951 | 7.029753 | -0.0047  |
| C | 0.914228 | 4.415719 | -0.0029  |
| C | 0.734886 | 7.292701 | -0.00617 |
| H | 0.685761 | 8.377245 | -0.00741 |
| C | 2.083122 | 5.265527 | -0.00454 |
| H | 3.041577 | 4.755145 | -0.00446 |
| C | 1.996776 | 6.63178  | -0.00609 |
| C | -3.40151 | 2.651121 | 0.001699 |
| O | -4.48823 | 3.211779 | 0.001581 |
| N | -3.24322 | 1.216216 | 0.00333  |
| C | -4.37607 | 0.309087 | 0.005043 |
| H | -5.268   | 0.939202 | 0.004869 |
| H | -4.37799 | -0.3222  | 0.899465 |
| H | -4.37908 | -0.32423 | -0.88794 |
| H | 2.907416 | 7.227626 | -0.00728 |
| O | 1.063434 | 3.15679  | -0.00153 |
| H | -0.22294 | 2.160001 | 0.000488 |

PCM

|   |           |           |           |
|---|-----------|-----------|-----------|
| C | 3.072228  | 2.293944  | 0.000226  |
| H | 3.712443  | 2.385699  | -0.884219 |
| H | 3.712431  | 2.385546  | 0.884696  |
| H | 2.35004   | 3.112066  | 0.000291  |
| C | 2.363703  | 0.988718  | 0.000104  |
| N | 1.056553  | 0.825291  | 0.000045  |
| C | 0.730964  | -0.535266 | 0.000021  |
| C | -0.527969 | -1.085764 | 0.00003   |
| H | -0.499058 | -2.174776 | 0.000064  |
| C | -1.832424 | -0.515968 | -0.000037 |
| C | -2.918174 | -1.447594 | 0.000097  |
| H | -2.671932 | -2.507489 | 0.000194  |
| C | -2.135082 | 0.91706   | -0.000255 |
| C | -4.235121 | -1.055743 | 0.000145  |
| H | -5.033958 | -1.79073  | 0.00027   |
| C | -3.529462 | 1.270856  | -0.000071 |
| H | -3.756283 | 2.333488  | -0.000106 |
| C | -4.532907 | 0.330649  | 0.00009   |
| C | 1.992632  | -1.262663 | -0.000057 |
| O | 2.249321  | -2.462685 | -0.000088 |
| N | 2.974033  | -0.227753 | -0.000022 |
| C | 4.407488  | -0.484789 | -0.000073 |
| H | 4.529379  | -1.568547 | -0.000109 |
| H | 4.87723   | -0.065915 | 0.89364   |
| H | 4.877187  | -0.065864 | -0.893786 |
| H | -5.571413 | 0.654984  | 0.000171  |
| O | -1.261269 | 1.855018  | -0.000247 |
| H | 0.220164  | 1.499469  | 0.000091  |

***SI-14: Cartesian coordinates (Å) of geometry of F-S0 calculated at B3LYP/6-31G(d) level.***

|   |          |          |          |
|---|----------|----------|----------|
| C | -1.46258 | -0.55079 | -0.23208 |
| H | -1.88279 | -1.03211 | -1.12364 |
| H | -1.73261 | -1.16772 | 0.633651 |
| H | -0.37314 | -0.55175 | -0.32387 |
| C | -1.97101 | 0.838736 | -0.08058 |
| N | -1.21978 | 1.940868 | -0.07163 |
| C | -1.99898 | 3.106008 | 0.046262 |
| C | -1.56254 | 4.433295 | 0.034998 |
| H | -2.37468 | 5.15684  | -0.0283  |
| C | -0.2905  | 4.99613  | 0.051944 |
| C | 0.935391 | 4.287521 | 0.296634 |
| H | 0.904775 | 3.241684 | 0.598219 |
| C | -0.23321 | 6.470065 | -0.18967 |

|   |          |          |          |
|---|----------|----------|----------|
| C | 2.150538 | 4.91044  | 0.26736  |
| H | 3.059717 | 4.357392 | 0.485489 |
| C | 1.106949 | 7.059274 | -0.22398 |
| H | 1.153585 | 8.127068 | -0.41702 |
| C | 2.227856 | 6.316351 | -0.01603 |
| C | -3.36623 | 2.659078 | 0.129576 |
| O | -4.43893 | 3.232945 | 0.245733 |
| N | -3.25659 | 1.206641 | 0.057361 |
| C | -4.42386 | 0.345954 | 0.122197 |
| H | -5.28112 | 1.014611 | 0.226941 |
| H | -4.37492 | -0.32311 | 0.987146 |
| H | -4.53229 | -0.24499 | -0.79284 |
| H | 3.207225 | 6.79025  | -0.04392 |
| O | -1.24878 | 7.156983 | -0.37083 |
| H | -0.22744 | 1.943916 | -0.25729 |

#### PCM

|   |           |           |           |
|---|-----------|-----------|-----------|
| C | -3.511777 | 2.239401  | 0.112698  |
| H | -4.163839 | 2.193881  | 0.991839  |
| H | -4.151924 | 2.293973  | -0.774856 |
| H | -2.911221 | 3.149206  | 0.167744  |
| C | -2.639941 | 1.039528  | 0.049944  |
| N | -1.30936  | 1.049572  | 0.051505  |
| C | -0.787113 | -0.257046 | -0.001672 |
| C | 0.525714  | -0.699796 | -0.009129 |
| H | 0.591925  | -1.787255 | -0.001305 |
| C | 1.778142  | -0.068494 | -0.016335 |
| C | 1.997861  | 1.343315  | -0.103706 |
| H | 1.153293  | 2.019821  | -0.196843 |
| C | 2.949089  | -0.978023 | 0.057392  |
| C | 3.256934  | 1.884677  | -0.108849 |
| H | 3.395434  | 2.958812  | -0.184875 |
| C | 4.253705  | -0.334359 | 0.051802  |
| H | 5.118907  | -0.989864 | 0.109414  |
| C | 4.394211  | 1.02376   | -0.024486 |
| C | -1.939817 | -1.130448 | -0.044701 |
| O | -2.046413 | -2.352835 | -0.099918 |
| N | -3.063789 | -0.236001 | -0.015362 |
| C | -4.44673  | -0.694637 | -0.049267 |
| H | -4.409972 | -1.783998 | -0.07737  |
| H | -4.955237 | -0.322681 | -0.942122 |
| H | -4.983185 | -0.369019 | 0.845202  |
| H | 5.38922   | 1.464592  | -0.027079 |

|   |           |           |          |
|---|-----------|-----------|----------|
| O | 2.837307  | -2.225683 | 0.126296 |
| H | -0.770176 | 1.898413  | 0.144085 |

**SI-15: Cartesian coordinates (Å) of geometry of G-S0 calculated at B3LYP/6-31G(d) level.**

|   |          |          |          |
|---|----------|----------|----------|
| C | -4.36844 | -1.35016 | 0.368233 |
| H | -4.95778 | -1.34021 | -0.55684 |
| H | -4.94092 | -0.80648 | 1.129799 |
| H | -4.26746 | -2.38847 | 0.695846 |
| C | -3.02858 | -0.7385  | 0.161302 |
| N | -1.85739 | -1.34092 | 0.345453 |
| C | -0.765   | -0.49439 | 0.066997 |
| C | 0.542567 | -0.99058 | 0.217834 |
| H | 0.598907 | -2.03125 | 0.549207 |
| C | 1.80043  | -0.44521 | 0.038579 |
| C | 2.08605  | 0.899158 | -0.38988 |
| H | 1.253819 | 1.563543 | -0.5982  |
| C | 2.931649 | -1.38461 | 0.33336  |
| C | 3.372962 | 1.328325 | -0.53042 |
| H | 3.578726 | 2.344753 | -0.85418 |
| C | 4.273852 | -0.83959 | 0.155665 |
| H | 5.099897 | -1.5123  | 0.366914 |
| C | 4.472301 | 0.443624 | -0.25274 |
| C | -1.34663 | 0.760235 | -0.33086 |
| O | -0.89621 | 1.848185 | -0.68268 |
| N | -2.77591 | 0.521488 | -0.24405 |
| C | -3.74418 | 1.553863 | -0.56709 |
| H | -3.16052 | 2.432715 | -0.84867 |
| H | -4.37077 | 1.793327 | 0.297943 |
| H | -4.3786  | 1.252769 | -1.40683 |
| H | 5.486876 | 0.819282 | -0.37551 |
| O | 2.744998 | -2.55512 | 0.706399 |
| H | -1.75311 | -2.29822 | 0.652846 |

PCM

|   |           |           |           |
|---|-----------|-----------|-----------|
| C | -4.365612 | -1.474231 | 0.000203  |
| H | -4.949845 | -1.195055 | -0.883638 |
| H | -4.947392 | -1.198753 | 0.886853  |
| H | -4.22198  | -2.556368 | -0.002219 |
| C | -3.054832 | -0.777016 | -0.000149 |
| N | -1.86439  | -1.358053 | -0.000334 |
| C | -0.813695 | -0.41178  | -0.000219 |
| C | 0.511401  | -0.844579 | -0.000096 |

|   |           |           |           |
|---|-----------|-----------|-----------|
| H | 0.62514   | -1.930408 | -0.000062 |
| C | 1.750596  | -0.195286 | -0.000018 |
| C | 1.945502  | 1.225371  | -0.000007 |
| H | 1.067257  | 1.862256  | -0.000155 |
| C | 2.932844  | -1.097359 | 0.000097  |
| C | 3.201494  | 1.773228  | -0.000032 |
| H | 3.332248  | 2.851649  | -0.000086 |
| C | 4.229497  | -0.440184 | 0.000141  |
| H | 5.103501  | -1.086613 | 0.000219  |
| C | 4.350449  | 0.922222  | 0.000071  |
| C | -1.471946 | 0.875681  | -0.000415 |
| O | -1.06065  | 2.037876  | 0.000006  |
| N | -2.87095  | 0.55865   | 0.000018  |
| C | -3.913256 | 1.576765  | 0.000308  |
| H | -3.40481  | 2.541064  | 0.002798  |
| H | -4.537346 | 1.489698  | 0.893172  |
| H | -4.534676 | 1.493005  | -0.894756 |
| H | 5.340745  | 1.374407  | 0.000092  |
| O | 2.83426   | -2.348486 | 0.000156  |
| H | -1.729009 | -2.361182 | -0.000234 |

***SI-16: Cartesian coordinates (Å) of geometry of H-S0 calculated at B3LYP/6-31G(d) level.***

|   |          |          |          |
|---|----------|----------|----------|
| C | -4.36359 | -1.21763 | 0.504278 |
| H | -5.05569 | -1.07556 | -0.33465 |
| H | -4.77965 | -0.68418 | 1.368016 |
| H | -4.33512 | -2.28428 | 0.743993 |
| C | -3.00145 | -0.72186 | 0.169628 |
| N | -1.88043 | -1.44518 | 0.210315 |
| C | -0.73806 | -0.67606 | -0.08615 |
| C | 0.535032 | -1.2608  | -0.14789 |
| H | 0.530266 | -2.34766 | -0.2746  |
| C | 1.792218 | -0.66939 | -0.0812  |
| C | 2.938033 | -1.44944 | -0.46744 |
| H | 2.768016 | -2.46715 | -0.81752 |
| C | 2.008137 | 0.692922 | 0.483285 |
| C | 4.202264 | -0.93823 | -0.44457 |
| H | 5.048363 | -1.53947 | -0.76505 |
| C | 3.386241 | 1.184242 | 0.437894 |
| H | 3.539888 | 2.198037 | 0.796182 |
| C | 4.417019 | 0.411103 | -0.00033 |
| C | -1.23161 | 0.633496 | -0.43896 |
| O | -0.73043 | 1.641152 | -0.90464 |
| N | -2.67287 | 0.524025 | -0.20587 |



|   |          |          |          |
|---|----------|----------|----------|
| C | -3.56403 | 1.647256 | -0.42608 |
| H | -2.92717 | 2.4675   | -0.76498 |
| H | -4.07289 | 1.936724 | 0.498993 |
| H | -4.30684 | 1.420631 | -1.19793 |
| H | 5.43056  | 0.808134 | -0.00483 |
| O | 1.103982 | 1.34913  | 1.02064  |
| H | -1.84466 | -2.39957 | 0.539222 |

PCM

|   |           |           |           |
|---|-----------|-----------|-----------|
| C | -4.38313  | -1.220592 | 0.425344  |
| H | -5.013816 | -1.095989 | -0.461779 |
| H | -4.847322 | -0.663405 | 1.246529  |
| H | -4.357541 | -2.279258 | 0.690283  |
| C | -3.010146 | -0.717876 | 0.164683  |
| N | -1.894792 | -1.434218 | 0.250441  |
| C | -0.747045 | -0.650992 | -0.002021 |
| C | 0.520434  | -1.222031 | -0.04099  |
| H | 0.511343  | -2.312241 | -0.108092 |
| C | 1.799632  | -0.639039 | -0.020738 |
| C | 2.901536  | -1.454162 | -0.446033 |
| H | 2.684877  | -2.469438 | -0.775049 |
| C | 2.073341  | 0.711527  | 0.517689  |
| C | 4.187692  | -0.984499 | -0.489304 |
| H | 4.998152  | -1.615202 | -0.842461 |
| C | 3.457125  | 1.15786   | 0.411929  |
| H | 3.664033  | 2.166959  | 0.760071  |
| C | 4.455062  | 0.353858  | -0.066017 |
| C | -1.252858 | 0.657285  | -0.36268  |
| O | -0.726949 | 1.670554  | -0.806677 |
| N | -2.682284 | 0.536745  | -0.190682 |
| C | -3.601326 | 1.638539  | -0.439287 |
| H | -2.988261 | 2.489121  | -0.738933 |
| H | -4.159392 | 1.888927  | 0.466585  |
| H | -4.297275 | 1.390611  | -1.244882 |
| H | 5.476101  | 0.728457  | -0.111899 |
| O | 1.207195  | 1.413964  | 1.086524  |
| H | -1.875243 | -2.401647 | 0.547103  |

***SI-17: Cartesian coordinates (Å) of geometry of AB-TS calculated at B3LYP/6-31G(d) level.***

|   |          |          |          |
|---|----------|----------|----------|
| C | -3.43569 | 3.387243 | -4.23811 |
| H | -4.38752 | 3.846808 | -4.53175 |
| H | -3.45413 | 2.346803 | -4.58533 |

|   |          |          |          |
|---|----------|----------|----------|
| H | -2.61758 | 3.914008 | -4.73144 |
| C | -3.23401 | 3.459973 | -2.76203 |
| N | -2.23374 | 4.060437 | -2.19077 |
| C | -2.426   | 3.89196  | -0.80998 |
| C | -1.64803 | 4.352622 | 0.188745 |
| H | -1.97733 | 4.105612 | 1.199595 |
| C | -0.40858 | 5.154182 | 0.021226 |
| C | -0.44577 | 6.55345  | -0.03382 |
| H | -1.41028 | 7.052265 | 0.005478 |
| C | 0.84069  | 4.508927 | -0.03604 |
| C | 0.726555 | 7.300894 | -0.13293 |
| H | 0.677595 | 8.384963 | -0.17506 |
| C | 2.019376 | 5.254171 | -0.13083 |
| H | 2.96588  | 4.724352 | -0.17379 |
| C | 1.958998 | 6.644226 | -0.1766  |
| C | -3.68214 | 3.099215 | -0.5766  |
| O | -4.21398 | 2.724446 | 0.452651 |
| N | -4.13926 | 2.865231 | -1.87829 |
| C | -5.34802 | 2.124163 | -2.18259 |
| H | -5.78107 | 1.822508 | -1.22622 |
| H | -5.12953 | 1.229177 | -2.77506 |
| H | -6.07073 | 2.744485 | -2.72335 |
| H | 2.879745 | 7.216676 | -0.25186 |
| O | 0.956263 | 3.147752 | 0.004337 |
| H | 0.064783 | 2.763583 | -0.04926 |

***SI-18: Cartesian coordinates (Å) of geometry of BC-TS calculated at B3LYP/6-31G(d) level.***

|   |          |          |          |
|---|----------|----------|----------|
| C | 3.828352 | 1.573242 | -1.16737 |
| H | 4.703246 | 1.011661 | -1.52009 |
| H | 4.176374 | 2.254284 | -0.37959 |
| H | 3.431757 | 2.164714 | -1.99435 |
| C | 2.758631 | 0.663812 | -0.67152 |
| N | 1.51643  | 0.626431 | -1.17815 |
| C | 0.834046 | -0.29514 | -0.46263 |
| C | -0.54634 | -0.70423 | -0.73799 |
| H | -0.66963 | -1.46338 | -1.51065 |
| C | -1.69165 | -0.07834 | -0.19362 |
| C | -1.61045 | 1.111611 | 0.588149 |
| H | -0.62743 | 1.526658 | 0.787429 |
| C | -3.00336 | -0.60805 | -0.42906 |
| C | -2.74426 | 1.758    | 1.046398 |
| H | -2.64958 | 2.672895 | 1.624255 |
| C | -4.1386  | 0.056571 | 0.022588 |

|   |          |          |          |
|---|----------|----------|----------|
| H | -5.1095  | -0.38077 | -0.18815 |
| C | -4.01573 | 1.239146 | 0.753179 |
| C | 1.703868 | -0.90129 | 0.550842 |
| O | 1.518648 | -1.78232 | 1.38771  |
| N | 2.935538 | -0.21899 | 0.352371 |
| C | 4.124612 | -0.47444 | 1.142422 |
| H | 3.864045 | -1.25792 | 1.857365 |
| H | 4.439118 | 0.421995 | 1.687289 |
| H | 4.951198 | -0.82061 | 0.512944 |
| H | -4.90854 | 1.746827 | 1.106887 |
| O | -3.19234 | -1.7779  | -1.10854 |
| H | -2.37002 | -2.292   | -1.08465 |

***SI-19: Cartesian coordinates (Å) of geometry of CD-TS calculated at B3LYP/6-31G(d) level.***

|   |          |          |          |
|---|----------|----------|----------|
| C | -4.81612 | 5.149351 | -3.35125 |
| H | -5.8872  | 4.941129 | -3.23817 |
| H | -4.52422 | 4.822791 | -4.357   |
| H | -4.65066 | 6.224114 | -3.26276 |
| C | -4.01728 | 4.450117 | -2.30312 |
| N | -3.26121 | 5.05327  | -1.43697 |
| C | -2.69666 | 4.039097 | -0.64037 |
| C | -1.85699 | 4.273704 | 0.388525 |
| H | -1.62066 | 5.322882 | 0.577144 |
| C | -1.24276 | 3.250551 | 1.27541  |
| C | -1.8699  | 2.842078 | 2.459696 |
| H | -2.84847 | 3.248987 | 2.699894 |
| C | 0.023499 | 2.721228 | 0.964519 |
| C | -1.25879 | 1.932542 | 3.320543 |
| H | -1.76195 | 1.62513  | 4.232479 |
| C | 0.642569 | 1.812371 | 1.826831 |
| H | 1.618317 | 1.421856 | 1.555243 |
| C | 0.001539 | 1.422307 | 2.999264 |
| C | -3.19295 | 2.700978 | -1.1243  |
| O | -2.96801 | 1.566139 | -0.75057 |
| N | -4.03526 | 3.060087 | -2.18716 |
| C | -4.76333 | 2.094816 | -2.98746 |
| H | -4.50589 | 1.107077 | -2.59852 |
| H | -4.47388 | 2.151503 | -4.04232 |
| H | -5.8456  | 2.241972 | -2.90416 |
| H | 0.488341 | 0.713104 | 3.663483 |
| O | 0.698203 | 3.072821 | -0.17113 |
| H | 0.113315 | 3.626572 | -0.71557 |

**SI-20: Cartesian coordinates (Å) of geometry of AD-TS calculated at B3LYP/6-31G(d) level.**

|   |          |          |          |
|---|----------|----------|----------|
| C | -3.75135 | -1.80738 | -0.66858 |
| H | -4.63419 | -1.38215 | -1.16297 |
| H | -4.08389 | -2.21567 | 0.294858 |
| H | -3.36148 | -2.62218 | -1.28098 |
| C | -2.68234 | -0.78618 | -0.48979 |
| N | -1.4423  | -0.91055 | -0.98551 |
| C | -0.73874 | 0.173449 | -0.56367 |
| C | 0.587974 | 0.529007 | -1.0779  |
| H | 0.593049 | 0.957523 | -2.08059 |
| C | 1.853177 | 0.212707 | -0.52851 |
| C | 3.030312 | 0.686483 | -1.18447 |
| H | 2.901463 | 1.264156 | -2.09648 |
| C | 2.051945 | -0.56219 | 0.663851 |
| C | 4.297541 | 0.451031 | -0.68796 |
| H | 5.167519 | 0.836377 | -1.21172 |
| C | 3.335576 | -0.79102 | 1.158023 |
| H | 3.433135 | -1.3833  | 2.06253  |
| C | 4.453663 | -0.28541 | 0.498229 |
| C | -1.61604 | 1.071131 | 0.203926 |
| O | -1.43568 | 2.168167 | 0.722623 |
| N | -2.85353 | 0.368239 | 0.211848 |
| C | -4.04031 | 0.856059 | 0.88968  |
| H | -3.78178 | 1.82828  | 1.314595 |
| H | -4.34468 | 0.178728 | 1.694545 |
| H | -4.87148 | 0.977783 | 0.187604 |
| H | 5.445486 | -0.47457 | 0.898856 |
| O | 1.024109 | -1.11497 | 1.363595 |
| H | 0.211771 | -1.08054 | 0.828684 |

**SI-21: Cartesian coordinates (Å) of geometry of EF-TS calculated at B3LYP/6-31G(d) level.**

|   |          |          |          |
|---|----------|----------|----------|
| C | -2.39798 | 2.454935 | 0.568846 |
| H | -1.55127 | 3.139704 | 0.490921 |
| H | -2.81308 | 2.522139 | 1.581334 |
| H | -3.1784  | 2.771877 | -0.1323  |
| C | -1.9588  | 1.064972 | 0.2729   |
| N | -0.72548 | 0.710499 | -0.03027 |
| C | -0.67342 | -0.66248 | -0.35448 |
| C | 0.471205 | -1.2135  | -0.84059 |
| H | 0.320615 | -2.26165 | -1.12523 |
| C | 1.842321 | -0.83754 | -0.47703 |
| C | 2.382329 | -1.34359 | 0.734455 |

|   |          |          |          |
|---|----------|----------|----------|
| H | 1.94721  | -2.24457 | 1.167031 |
| C | 2.195826 | 0.542249 | -0.80847 |
| C | 3.497507 | -0.7791  | 1.327651 |
| H | 3.907921 | -1.21069 | 2.23566  |
| C | 3.44795  | 1.022725 | -0.29583 |
| H | 3.79438  | 1.988557 | -0.65412 |
| C | 4.063644 | 0.38356  | 0.759681 |
| C | -2.0377  | -1.17092 | -0.24427 |
| O | -2.53805 | -2.2648  | -0.40742 |
| N | -2.77206 | -0.017   | 0.24318  |
| C | -4.19049 | -0.07228 | 0.55648  |
| H | -4.49805 | -1.10783 | 0.398454 |
| H | -4.76904 | 0.58101  | -0.10415 |
| H | -4.37196 | 0.205669 | 1.598999 |
| H | 4.961151 | 0.813052 | 1.201883 |
| O | 1.392945 | 1.307512 | -1.4573  |
| H | 0.039778 | 1.272268 | -0.42715 |

**SI-22: Cartesian coordinates (Å) of geometry of FG-TS calculated at B3LYP/6-31G(d) level.**

|   |          |          |          |
|---|----------|----------|----------|
| C | -1.8728  | -0.62981 | -1.04097 |
| H | -2.79003 | -1.0743  | -1.44787 |
| H | -1.5409  | -1.26749 | -0.21104 |
| H | -1.10678 | -0.66948 | -1.82147 |
| C | -2.09225 | 0.775418 | -0.60422 |
| N | -1.43156 | 1.84835  | -1.04967 |
| C | -1.85388 | 3.023261 | -0.41943 |
| C | -1.36014 | 4.346062 | -0.82521 |
| H | -1.87755 | 4.883101 | -1.62355 |
| C | -0.29101 | 4.987304 | -0.28492 |
| C | 0.48288  | 4.451733 | 0.822698 |
| H | 0.176945 | 3.494125 | 1.233575 |
| C | 0.097722 | 6.330248 | -0.86495 |
| C | 1.527279 | 5.139781 | 1.341039 |
| H | 2.091236 | 4.739405 | 2.178721 |
| C | 1.236852 | 7.003885 | -0.22959 |
| H | 1.513161 | 7.971912 | -0.636   |
| C | 1.904604 | 6.433154 | 0.801894 |
| C | -2.88562 | 2.669183 | 0.483911 |
| O | -3.61029 | 3.283225 | 1.270471 |
| N | -2.96848 | 1.215284 | 0.320551 |
| C | -3.91669 | 0.429144 | 1.082782 |
| H | -4.45182 | 1.146421 | 1.710398 |
| H | -3.40913 | -0.30596 | 1.716859 |

|   |          |          |          |
|---|----------|----------|----------|
| H | -4.62772 | -0.08638 | 0.428071 |
| H | 2.749082 | 6.950602 | 1.252385 |
| O | -0.49536 | 6.822874 | -1.82397 |
| H | -0.7037  | 1.810529 | -1.74866 |

**SI-23: Cartesian coordinates (Å) of geometry of GH-TS calculated at B3LYP/6-31G(d) level.**

|   |          |          |          |
|---|----------|----------|----------|
| C | -4.27854 | -0.88404 | 0.793379 |
| H | -5.01348 | -0.83547 | -0.01795 |
| H | -4.51399 | -0.08322 | 1.504279 |
| H | -4.38675 | -1.84426 | 1.303374 |
| C | -2.89794 | -0.71962 | 0.265081 |
| N | -1.90104 | -1.58077 | 0.453899 |
| C | -0.68068 | -1.08953 | -0.0799  |
| C | 0.542386 | -1.58384 | 0.21831  |
| H | 0.554438 | -2.45704 | 0.884421 |
| C | 1.767356 | -0.82254 | 0.014039 |
| C | 2.709541 | -1.04622 | -0.98514 |
| H | 2.529751 | -1.83057 | -1.71924 |
| C | 1.901395 | 0.280747 | 0.991781 |
| C | 3.888774 | -0.29876 | -1.04517 |
| H | 4.630652 | -0.50191 | -1.81177 |
| C | 3.167836 | 0.955549 | 0.914785 |
| H | 3.35487  | 1.711454 | 1.673772 |
| C | 4.106198 | 0.684525 | -0.06954 |
| C | -1.03766 | 0.165052 | -0.75859 |
| O | -0.43646 | 0.942138 | -1.45734 |
| N | -2.45956 | 0.320277 | -0.45497 |
| C | -3.22131 | 1.474669 | -0.90568 |
| H | -2.51679 | 2.10386  | -1.45302 |
| H | -3.6223  | 2.033092 | -0.05503 |
| H | -4.03534 | 1.1745   | -1.57246 |
| H | 5.035088 | 1.253697 | -0.08355 |
| O | 0.966884 | 0.589673 | 1.783408 |
| H | -1.9578  | -2.37354 | 1.078574 |

**SI-24: Cartesian coordinates (Å) of geometry of EH-TS calculated at B3LYP/6-31G(d) level.**

|   |          |          |          |
|---|----------|----------|----------|
| C | -1.80197 | -0.62962 | -0.93291 |
| H | -2.71594 | -1.14459 | -1.25718 |
| H | -1.41329 | -1.17033 | -0.06028 |
| H | -1.06512 | -0.71823 | -1.73718 |
| C | -2.05367 | 0.802526 | -0.62121 |
| N | -1.47561 | 1.849103 | -1.21837 |

|   |          |          |          |
|---|----------|----------|----------|
| C | -1.89289 | 3.056274 | -0.66431 |
| C | -1.36393 | 4.359651 | -1.06639 |
| H | -1.85777 | 4.872852 | -1.89998 |
| C | -0.36743 | 5.055795 | -0.45292 |
| C | -0.09949 | 6.427761 | -0.86201 |
| H | -0.65723 | 6.818252 | -1.71059 |
| C | 0.469503 | 4.469797 | 0.662927 |
| C | 0.772558 | 7.21226  | -0.18717 |
| H | 0.939666 | 8.241874 | -0.49003 |
| C | 1.33009  | 5.417452 | 1.385222 |
| H | 1.874433 | 5.01567  | 2.234244 |
| C | 1.481402 | 6.697165 | 0.968246 |
| C | -2.82275 | 2.758287 | 0.360359 |
| O | -3.50092 | 3.424509 | 1.148155 |
| N | -2.89027 | 1.299991 | 0.311071 |
| C | -3.75208 | 0.559271 | 1.208158 |
| H | -4.27208 | 1.314896 | 1.802548 |
| H | -3.1737  | -0.09255 | 1.872196 |
| H | -4.48282 | -0.04207 | 0.656133 |
| H | 2.156851 | 7.365089 | 1.498514 |
| O | 0.482174 | 3.268833 | 0.928244 |
| H | -0.71834 | 1.762005 | -1.87997 |

**SI-25:** CASPT2//CASSCF single point energies for the ground state and the first excited-state.

|               |                |              |
|---------------|----------------|--------------|
| CI-CAS(8,7)   | S <sub>0</sub> | -722.1362331 |
|               | S <sub>1</sub> | -722.1342248 |
| CI-CAS(12,11) | S <sub>0</sub> | -722.14356   |
|               | S <sub>0</sub> | -722.1346386 |

**SI-26:** The energy profile for the N<sub>2</sub>-H transfer process in the first excited state calculated at the CASSCF/6-31G(d) level in vacuum.

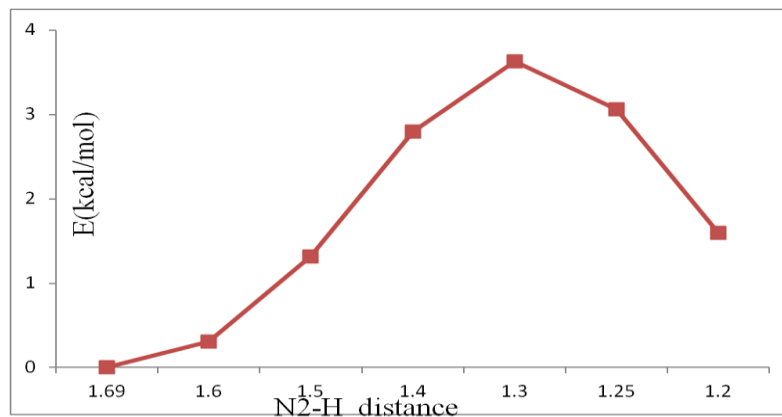

**Figure S4**

**SI-27: Energy profiles along the rotation around C3-C4 double bond (angle  $\tau$ ) in A-S<sub>1</sub> and E-S<sub>1</sub> potential energy surfaces at CASSCF/6-31G(d) level in vacuum.**

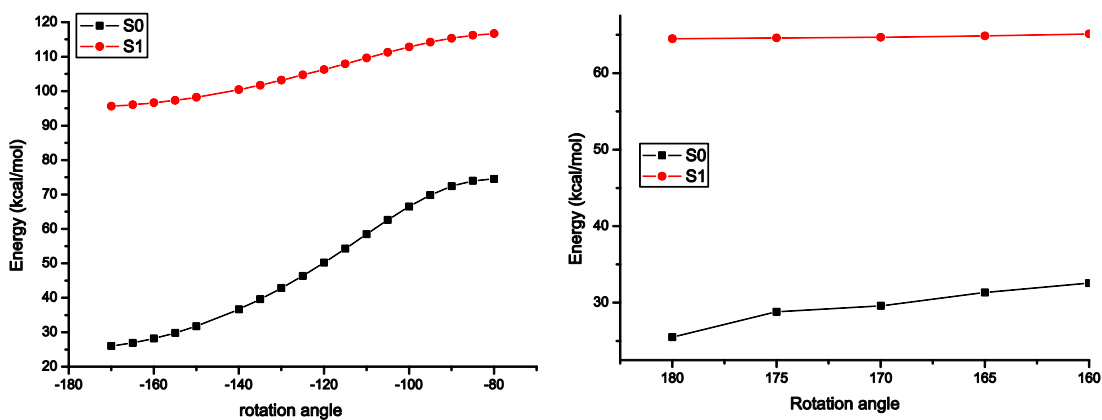

**Figure S5**

**SI-28: Calculated relative energies with different methods for important geometries.**

|                       | TDDFT/vacuum<br>kcal/mol              | CASSCF/vacuum<br>kcal/mol | CASPT2/PCM//CASSCF<br>kcal/mol |
|-----------------------|---------------------------------------|---------------------------|--------------------------------|
| A-S <sub>1</sub>      | Turn to<br>structure E-S <sub>1</sub> | 96.71                     | 75.68                          |
| E-S <sub>1</sub>      | 49.48                                 | 83.89                     | 63.50                          |
| A-E-TS-S <sub>1</sub> | -----                                 | 100.34                    | 69.91                          |
| CI                    | 40                                    | 71.40                     | 57.25                          |
